# Supplementary material for: Overcoming Therapeutic Inertia in Type 2 Diabetes: Exploring Machine Learning-Based Scenario Simulation for Improving Short-Term Glycemic Control
Source: MDPI journal article supplement (doi:10.3390/make6010021), 2024-02-14
Supplement: s1 [file s1]

**Table S1.** Summary of the AMD Annals variables included in the Logic Learning Machine analysis.

| ANTROPOMETRIC PARAMETERS                                                                    | ORGANIZATIONAL PARAMETERS                                                  |
|---------------------------------------------------------------------------------------------|----------------------------------------------------------------------------|
| Age                                                                                         | Q-score                                                                    |
| Sex                                                                                         | Years of clinical observation (considered a proxy of duration of diabetes) |
| Weight                                                                                      | <b>TREATMENTS</b>                                                          |
| Height                                                                                      | Drug therapy for diabetes (type and associations)                          |
| Body mass index (BMI)                                                                       | Drug therapy for dyslipidemia (type and associations)                      |
| Systolic blood pressure (BP); diastolic BP                                                  | Drug therapy for hypertension (present or not)                             |
| and derived variables or index                                                              | Additional drugs                                                           |
| BIOCHEMICAL PARAMETERS                                                                      | DIABETES COMPLICATIONS & COMORBIDITIES                                     |
| HbA1c at current visit; HbA1c at previous visit, HbA1c drop speed, HbA1c gap between visits | Presence of nephropathy                                                    |
| Number of out-of-range HbA1c values in the patient's history                                | Presence of atrial fibrillation                                            |
| Fasting glucose                                                                             | History of heart failure                                                   |
| Triglycerides                                                                               | History of stroke                                                          |
| Total cholesterol                                                                           | History of cardiac complications                                           |
| High-density lipoproteins (HDL)                                                             | Presence of vasculopathy                                                   |
| Low-density lipoproteins (LDL)                                                              | Presence of lower limb complications                                       |
| Creatinine                                                                                  | Presence of neuropathy                                                     |
| Estimated glomerular filtration rate (eGFR)                                                 | Presence of foot complications                                             |
| Micro–Macro/albuminuria                                                                     | Presence of eye complications                                              |
| Serum uric acid                                                                             | Presence of hepatopathy                                                    |
| Serum glutamic oxaloacetic transaminase (GOT)                                               |                                                                            |
| Serum glutamic pyruvic transaminase (GPT)                                                   |                                                                            |
| Mean, Trend and SD for each variable                                                        |                                                                            |

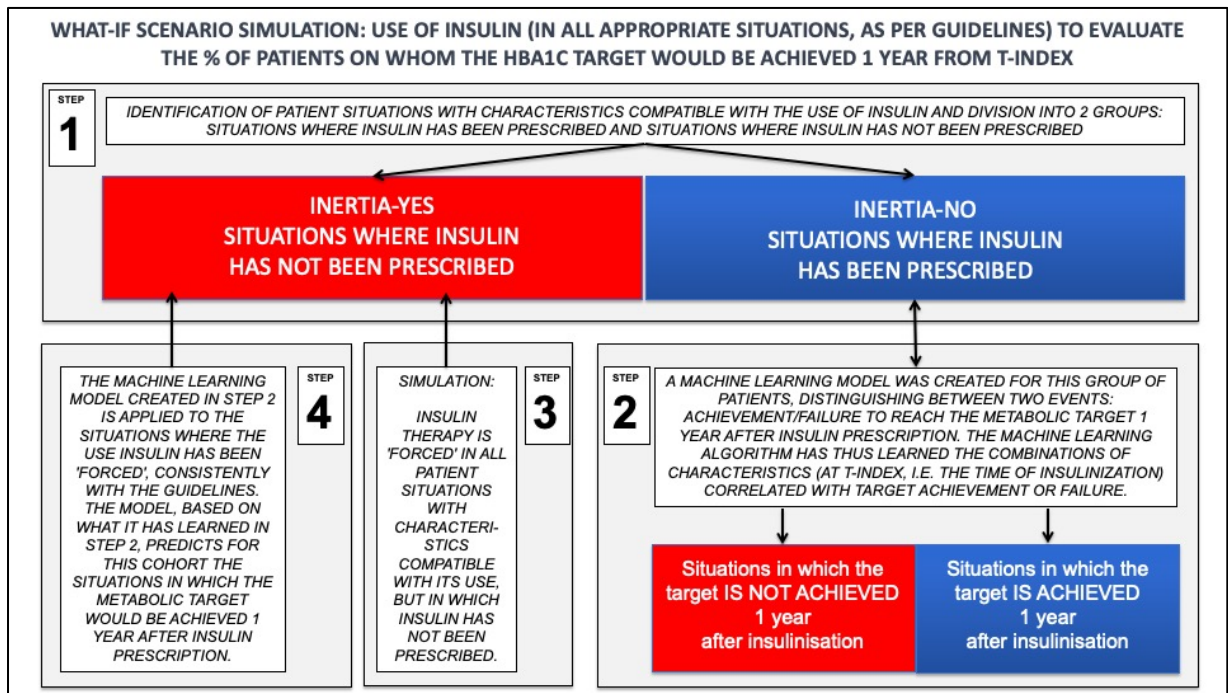

**Figure S1.** Schematization of LLM's use in the “What-If” analysis process.

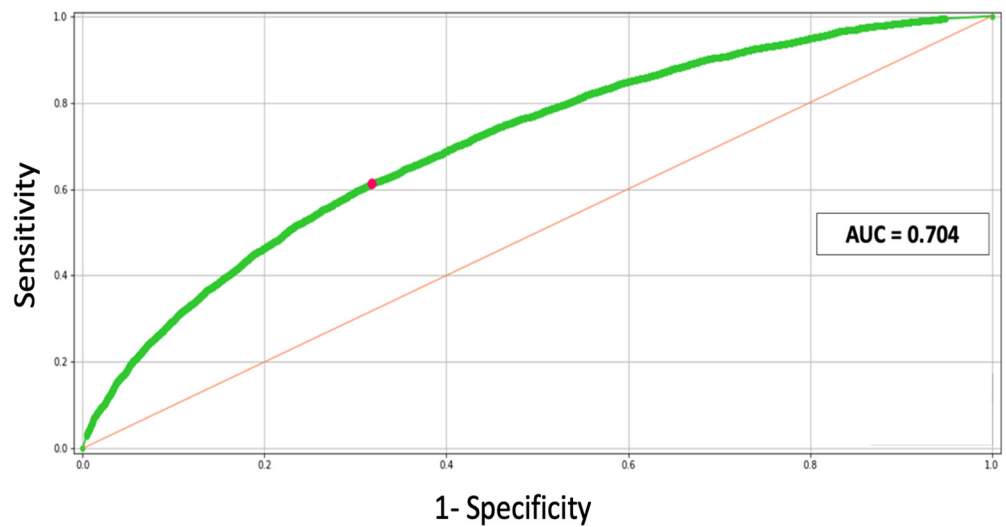

**Figure S2.** The ROC AUC for the '1Y TARGET' outcome model.
